# Supplementary material for: An automated and parallelised DIY-dosing unit for individual and complex feeding profiles: Construction, validation and applications
Source: PLoS One. 2019 Jun 19;14(6):e0217268. doi: 10.1371/journal.pone.0217268 (PMC6583958; doi:10.1371/journal.pone.0217268)
Supplement: S1 Table — The name and the part number of the used LEGOBricks is depicted here. (XLSX) [file pone.0217268.s001.xlsx]

## Sheet: Sheet1
Brick	Name	Part	Color code	Quantity
	Tacho Motor	53787	145 - Metallic Sand Blue	1
	MS-EV3, P-BRICK	95646	194 - Medium Stone Grey	1
	TECHNIC 2M BEAM	43857	321 - Dark Azur	1
	TECHNIC 3M BEAM	32523	145 - Metallic Sand Blue	2
	TECHNIC 3M BEAM	32523	316 - Titanium Metallic	2
	TECHNIC 3M BEAM	32523	321 - Dark Azur	2
	TECHNIC 7M BEAM	32524	28 - Dark Green	6
	TECHNIC 7M BEAM	32524	321 - Dark Azur	1
	TECHNIC 11M BEAM	32525	145 - Metallic Sand Blue	3
	TECHNIC 11M BEAM	32525	316 - Titanium Metallic	7
	TECHNIC 13M BEAM	41239	145 - Metallic Sand Blue	3
	TECHNIC 13M BEAM	41239	321 - Dark Azur	1
	TECHNIC 15M BEAM	32278	195 - Royal Blue	18
	LEVER 1X4, WITHOUT NOTCH	32449	106 - Bright Orange	3
	TRIANGLE	2905	194 - Medium Stone Grey	4
	1/2 BUSH	32123	194 - Medium Stone Grey	5
	2M CROSS AXLE W. GROOVE	32062	26 - Black	4
	CONNECTOR PEG W. FRICTION	2780	145 - Metallic Sand Blue	5
	CONNECTOR PEG W. FRICTION	2780	194 - Medium Stone Grey	20
	CONNECTOR PEG W. FRICTION	2780	321 - Dark Azur	5
	CONNECTOR PEG	3673	145 - Metallic Sand Blue	20
	CROSS AXLE 3M	4519	26 - Black	1
	CROSS AXLE 3M	4519	316 - Titanium Metallic	1
	BUSH FOR CROSS AXLE	6590	194 - Medium Stone Grey	6
	BUSH FOR CROSS AXLE	6590	199 - Dark Stone Grey	23
	CONN.BUSH W.FRIC./CROSSALE	43093	195 - Royal Blue	26
	CROSS AXLE 4M	3705	26 - Black	1
	CONNECTOR PEG W. FRICTION 3M	6558	23 - Bright Blue	19
	CATCH W. CROSS HOLE	32039	106 - Bright Orange	2
	CROSS AXLE 5M	32073	106 - Bright Orange	2
	DAMPER 2M	45590	195 - Royal Blue	7
	CROSS BLOCK 90°	6536	21 - Bright Red	2
	CROSS BLOCK 90°	6536	194 - Medium Stone Grey	4
	SINGLE BUSH 2M Ø4,9	15100	145 - Metallic Sand Blue	22
	SINGLE BUSH 2M Ø4,9	15100	321 - Dark Azur	6
	CROSS AXLE 6M	3706	145 - Metallic Sand Blue	1
	DOUBLE CROSS BLOCK	32184	21 - Bright Red	6
	DOUBLE CROSS BLOCK	32184	199 - Dark Stone Grey	2
	ANGLE ELEMENT, 180 DEGREES [2]	32034	21 - Bright Red	2
	CROSS BLOCK 3M	42003	106 - Bright Orange	2
	CROSS AXLE 10M	3737	26 - Black	1
	CROSS AXLE, 11 MODULE	23948	21 - Bright Red	1
	CROSS AXLE 12M	3708	26 - Black	1
	16M AXLE Ø 4.75 W. CROSS	50451	106 - Bright Orange	1
	16M AXLE Ø 4.75 W. CROSS	50451	199 - Dark Stone Grey	2
	KRYDSBLOK 2X4	98989	106 - Bright Orange	2
	CROSS AXLE 32M	50450	21 - Bright Red	4
	BLOCK 3X4X2	61904	199 - Dark Stone Grey	1
	Linear Actuator 10-15 M	61927	199 - Dark Stone Grey, 194 - Medium Stone Grey, 106 - Bright Orange, 131 - Silver	1
	CONICAL WHEEL Z12	6589	21 - Bright Red	1
	WORM	4716	26 - Black	2
	BEVEL GEAR Z20	32198	283 - Light Nougat	1
	GEAR WHEEL Z24	3648	194 - Medium Stone Grey	2
Total:				269
